# Supplementary material
Source: PubMed Central journal article supplement (PMC2871473)
Supplement: supp_M110.111054_jbc.M110.111054-1.pdf [file supp_M110.111054_jbc.M110.111054-1.pdf]

## Supplementary Fig.1

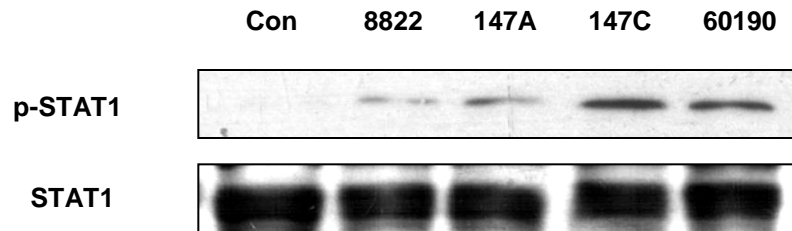

### **STAT1 activation according to *H. pylori* CagA status.**

Lysates from AGS cells co-incubated with *H. pylori* were immunoblotted with anti-phosphoserine-STAT1, then the membrane was stripped and reprobed with anti-STAT1 to confirm equal loading.
